# Supplementary figures and images for: Development of a silica-based double-network hydrogel for high-throughput screening of encapsulated enzymes
Source: Royal Society of Chemistry journal article supplement (doi:10.1039/b813936a), 2008-12-08

### Electronic Supplementary Data

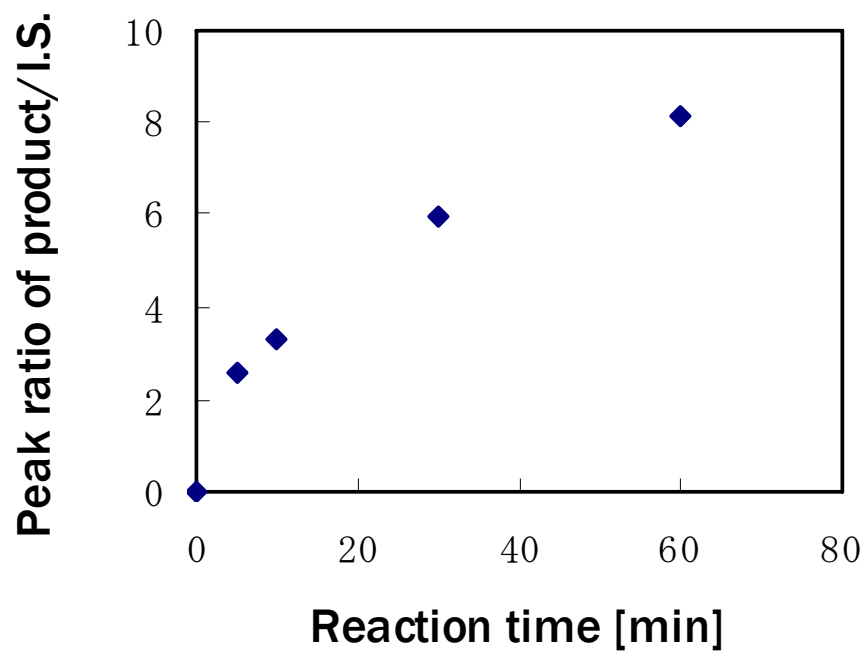

Supporting data 1

Supplement: b813936a.pdf [file b813936a.pdf]
